# Supplementary material for: Unsymmetric main-chain liquid crystal elastomers with tunable phase behaviour: elastic response
Source: Royal Society of Chemistry journal article supplement (doi:10.1039/c0jm03692g), 2011-01-01
Supplement: c0jm03692g.pdf [file c0jm03692g.pdf]

# Unsymmetric Main-Chain Liquid Crystal Elastomers with tunable Phase Behaviour: Elastic Response

Maria Amela-Cortes<sup>b§</sup>, Duncan W. Bruce<sup>a</sup>, Kenneth E. Evans<sup>b</sup> and Chris W. Smith<sup>b\*</sup>

|                                                                                                                                                   |   |
|---------------------------------------------------------------------------------------------------------------------------------------------------|---|
| I Sol content and swelling ratio of elastomers .....                                                                                              | 2 |
| II Stress-strain curves of polydomain films .....                                                                                                 | 2 |
| Figure S1. Nominal stress-strain curves for elastomers containing spacer S1 and cross-linker C1: M2 (○), M3(□).....                               | 2 |
| Figure S2. Nominal stress-strain curves for elastomers containing spacer S2 and cross-linker C1: M2 (Δ), M3(□) .....                              | 3 |
| Figure S3. Nominal stress-strain curves for elastomers containing monomer M3 and cross-linker C1: spacer S1 (Δ) and spacer S2 (□).....            | 3 |
| Figure S4. Nominal stress-strain curves for elastomers containing monomer M2 and cross-linker C3: spacer S1 (Δ) and spacer S2 (○) and S3 (□)..... | 4 |
| III Thermoelastic behaviour of elastomers.....                                                                                                    | 4 |
| Figure S5. Thermal expansion of E8 on heating (○) and cooling (□) cycles.....                                                                     | 4 |
| Figure S6. Thermal expansion of E6 on heating (□) and cooling (○) cycles.....                                                                     | 5 |
| Figure S7. Thermal expansion of E12: heating cycle (○), cooling cycle (□) and E13: heating cycle (Δ), cooling cycle (◇) .....                     | 5 |

## I Sol content and swelling ratio of elastomers

| Elastomer | Swelling ratio ( $q$ ) | Sol content (%) |
|-----------|------------------------|-----------------|
| E2        | 3                      | 5               |
| E3        | 4                      | 10              |
| E5        | 4                      | 10              |
| E6        | 4                      | 24              |
| E8        | 4                      | 25              |
| E10       | 7                      | 20              |
| E11       | 6                      | 18              |
| E12       | 9                      | 25              |

## II Stress-strain curves of polydomain films

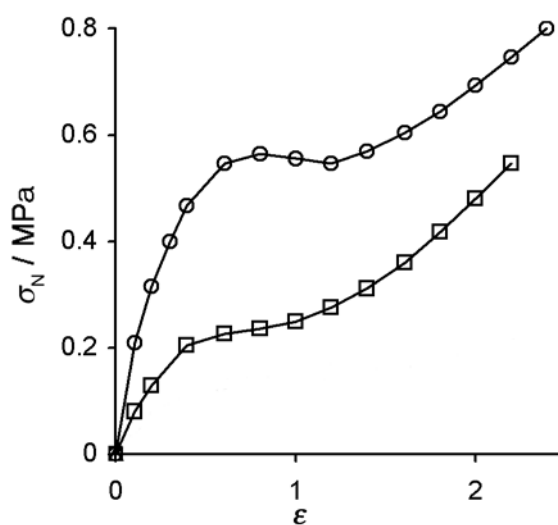

Figure S1. Nominal stress-strain curves for elastomers containing spacer S1 and cross-linker C1: M2 (○),  
M3(□)

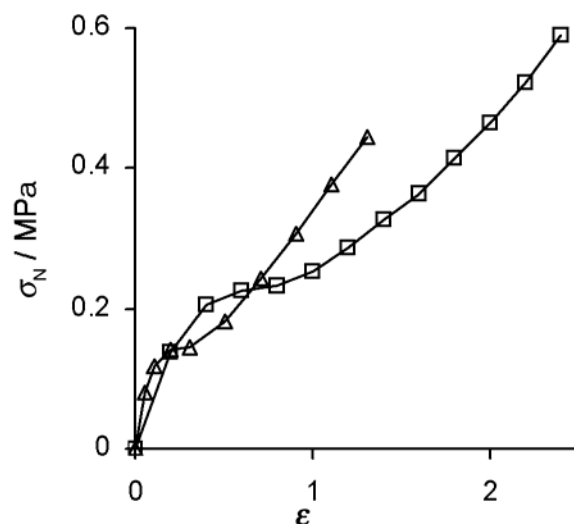

Figure S2. Nominal stress-strain curves for elastomers containing spacer S2 and cross-linker C1: M2 ( $\Delta$ ),  
M3( $\square$ )

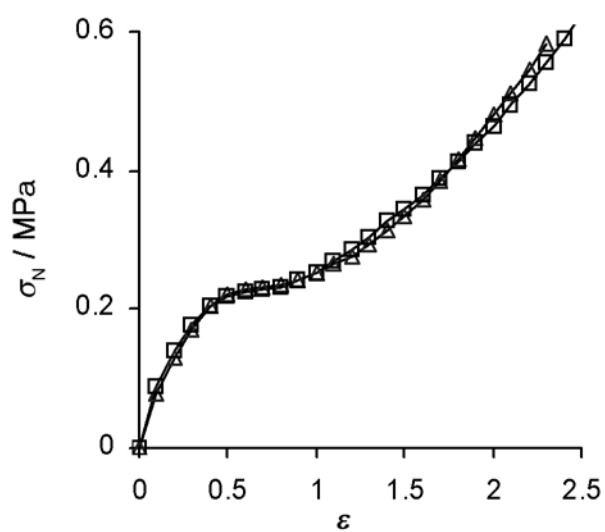

Figure S3. Nominal stress-strain curves for elastomers containing monomer M3 and cross-linker C1:  
spacer S1 ( $\Delta$ ) and spacer S2 ( $\square$ )

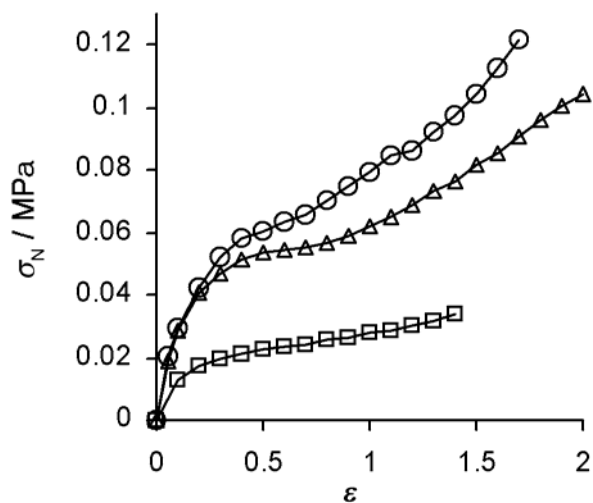

Figure S4. Nominal stress-strain curves for elastomers containing monomer M2 and cross-linker C3: spacer S1 ( $\Delta$ ) and spacer S2 ( $\circ$ ) and S3 ( $\square$ )

### III Thermoelastic behaviour of elastomers

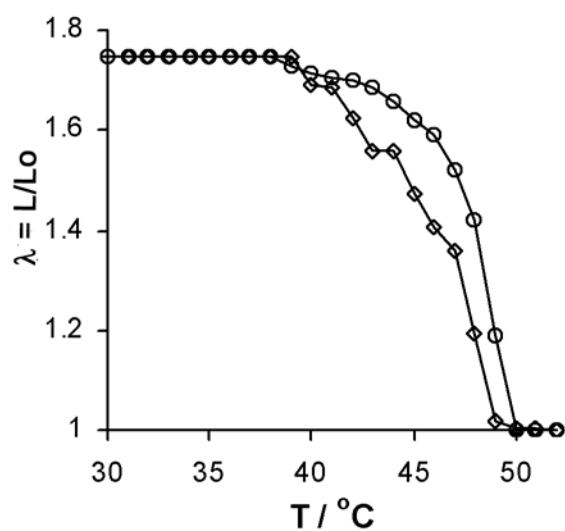

Figure S5. Thermal expansion of E8 on heating ( $\circ$ ) and cooling ( $\square$ ) cycles

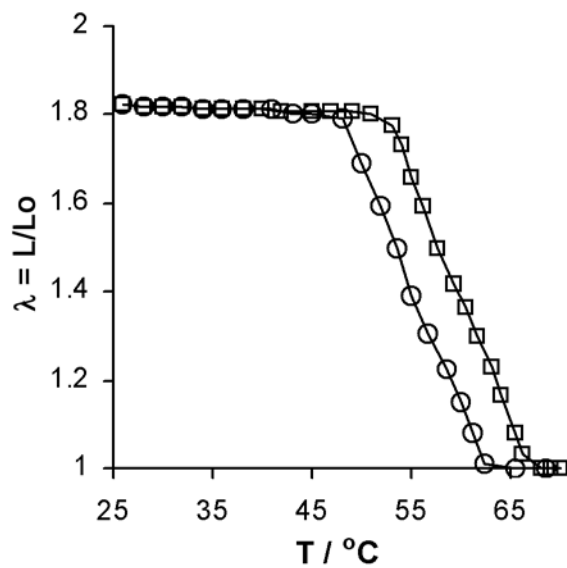

Figure S6. Thermal expansion of E6 on heating (□) and cooling (○) cycles

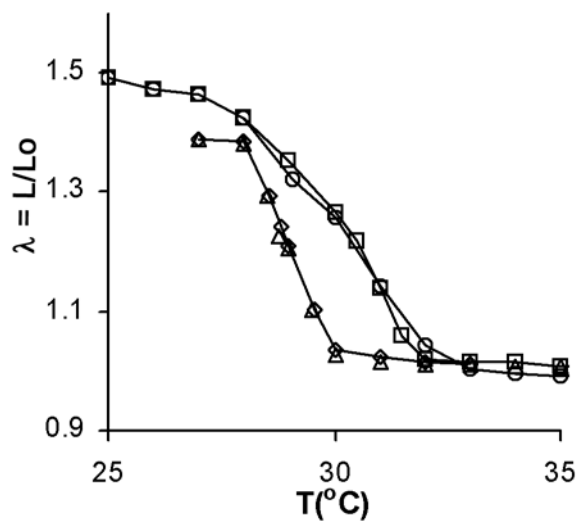

Figure S7. Thermal expansion of E12: heating cycle (○), cooling cycle (□) and E13: heating cycle (Δ), cooling cycle (◇)
